# Supplementary material for: Single center evaluation of sensitivity and specificity of CellDetect assay in early bladder cancer patients
Source: PubMed Central journal article supplement — Sci Rep. 2024 Nov 24;14:29099. doi: 10.1038/s41598-024-80705-7 (PMC11586397; doi:10.1038/s41598-024-80705-7), 2024-11-24
Supplement: 41598_2024_80705_MOESM1_ESM.pdf [file 41598_2024_80705_MOESM1_ESM.pdf]

## A Single Center Experience with Early Diagnostic Performance of CellDetect Assay in Bladder Cancer Patients

Wenbo Gao\*: Department of Urology, Ningbo Urology and Nephrology Hospital

Ningbo City, Zhejiang Province, P.R.China

gwbmDOC@foxmail.com

Zhiling Lou: corresponding author. Department of Urology, Ningbo Urology and Nephrology Hospital

Ningbo City, Zhejiang Province, P.R.China

lou\_zhiling@126.com

### 1. Overall patients included in the study.

|                   |          | Pathology result |          |
|-------------------|----------|------------------|----------|
|                   |          | positive         | negative |
| CellDetect result | Positive | 110              | 5        |
|                   | negative | 24               | 9        |

A final cohort of 148 patients: a fourfold table revealing the number of the patients distributed respectively according to the pathology results and CellDetect assay.

### 2. 87 patients included in Group P.

|                   |          | Pathology result |          |
|-------------------|----------|------------------|----------|
|                   |          | positive         | negative |
| CellDetect result | Positive | 64               | 4        |
|                   | negative | 15               | 4        |

In Group P, 87 patients: a fourfold table revealing the number of the patients -in Group P- distributed respectively according to the pathology results and CellDetect assay.

3. 61 patients included in Group R.

|                   |          | Pathology result |          |
|-------------------|----------|------------------|----------|
|                   |          | positive         | negative |
| CellDetect result | Positive | 46               | 1        |
|                   | negative | 9                | 5        |

In Group R, 61 patients: a fourfold table revealing the number of the patients -in Group R- distributed respectively according to the pathology results and CellDetect assay.

4. Low Grade BC patients

|                     |    |
|---------------------|----|
| CellDetect positive | 23 |
| CellDetect negative | 7  |

In Low Grade BC patients: 30 cases. A table revealing the number of the patients with positive or negative results of the CellDetect assay.

5. High Grade BC patients

|                     |    |
|---------------------|----|
| CellDetect positive | 87 |
| CellDetect negative | 17 |

In High Grade BC patients: 104 cases. A table revealing the number of the patients with positive or negative results of the CellDetect assay.
